# Supplementary material
Source: PubMed Central journal article supplement (PMC3613903)
Supplement: JCI61231sd.pdf [file JCI61231sd.pdf]

# Suppl. 1

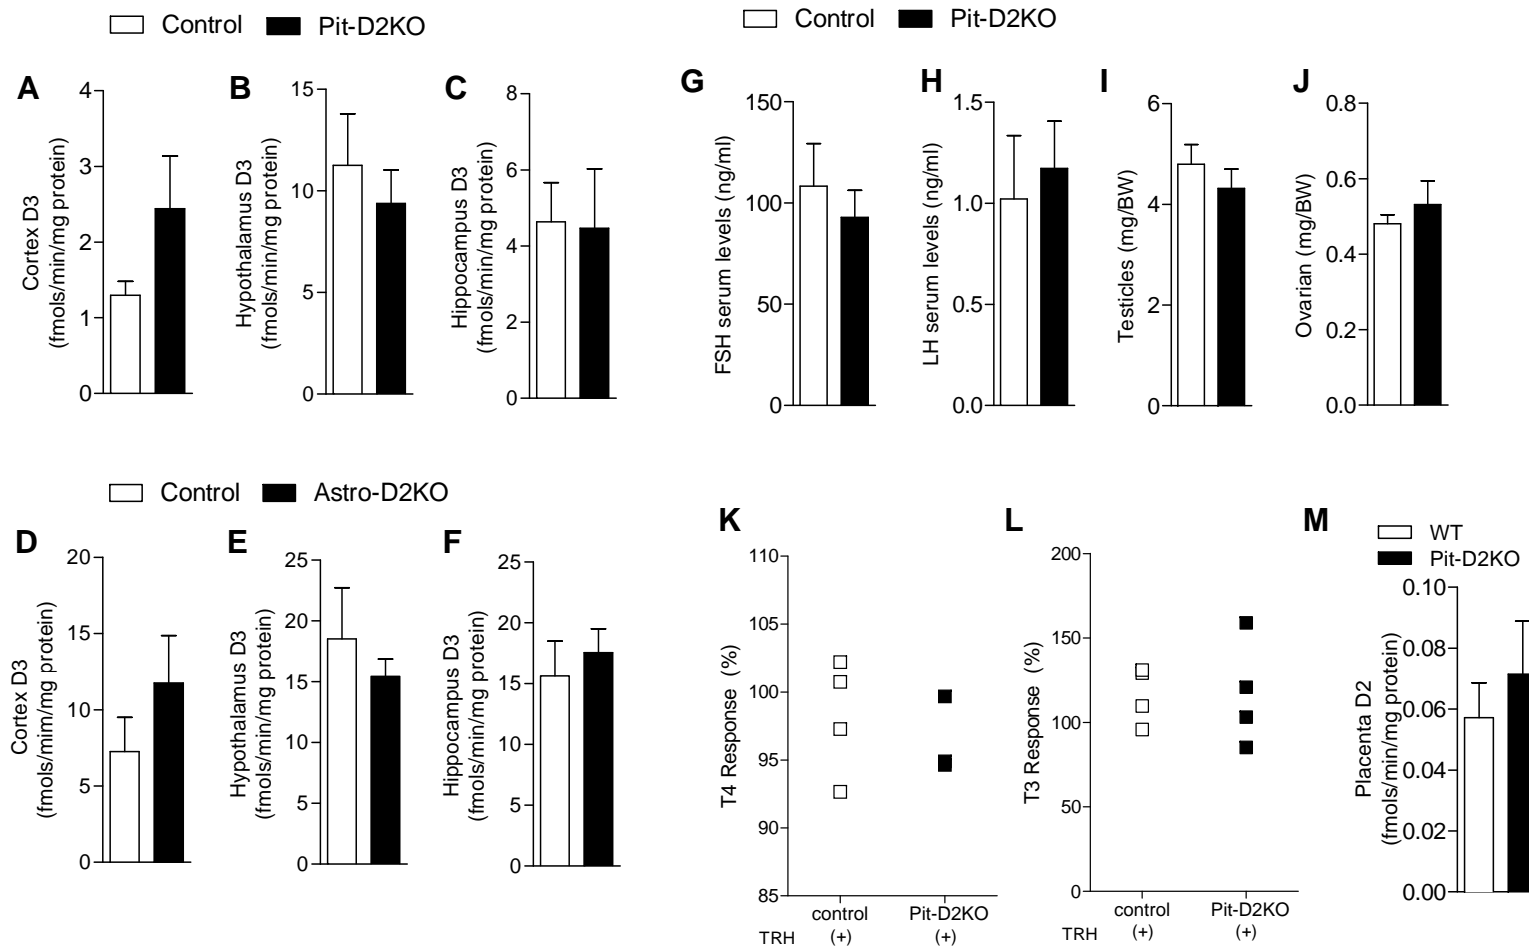

**Supplementary 1-** Additional experiments in Controls, Pit-D2KO and Astro-D2KO animals. **A-C**, D3 activity in the cortex, hypothalamus and hippocampus of control and Pit-D2KO mice (n=5). **D-F**, D3 activity in the cortex, hypothalamus and hippocampus of control and Astro-D2KO mice (n=6). **G,H**, Serum FSH and LH levels of control and Pit-D2KO mice (n=8). **I,J**, Relative testicles and ovarian weight (mg/mg body weight) in Pit-D2KO mice (n=8-10). **K**, percent of T4 response and **L**, percent of T3 response after 30 min of TRH injection in Pit-D2KO and control mice [%response= serum level after stimulation X 100/serum level before stimulation] (n=4). **M**, Placenta D2 activity of control and Pit-D2KO mice (n=6-7). Results are expressed as mean  $\pm$  SEM.
